# Supplementary material for: Rap1a Activity Elevated the Impact of Endogenous AGEs in Diabetic Collagen to Stimulate Increased Myofibroblast Transition and Oxidative Stress
Source: Int J Mol Sci. 2022 Apr 19;23(9):4480. doi: 10.3390/ijms23094480 (PMC9101126; doi:10.3390/ijms23094480)
Supplement: Supplementary file 1 [file ijms-23-04480-s001.zip › ijms-1655658-supplementary.pdf]

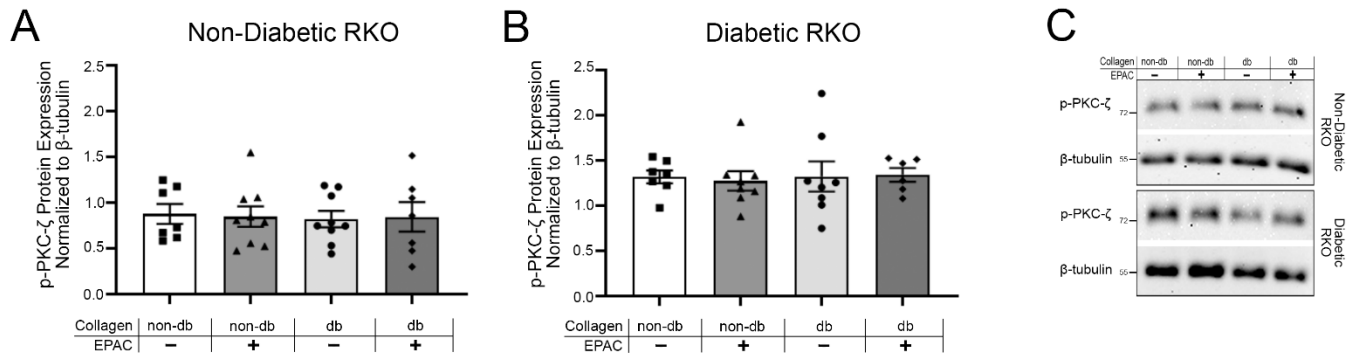

**Figure S1.** Neither endogenous AGE exposure nor Rap1a activation caused a shift in p-PKC- $\zeta$  protein expression in RKO fibroblasts. Non-diabetic and diabetic RKO cardiac fibroblasts were isolated and cultured either on non-diabetic or diabetic collagen. Fibroblasts were either untreated or treated with EPAC (100  $\mu$ M). Protein was collected from fibroblasts and used to determine changes in (A,B) p-PKC- $\zeta$  (72 kDa) protein expression. (C) Representative Western blot images for p-PKC- $\zeta$  in RKO fibroblasts. Protein expression was normalized to  $\beta$ -tubulin (55 kDa) and mean  $\pm$  SEM are depicted on graph (n = 7–8). Statistical analysis consisted of one-way ANOVA followed by a Fisher's Protected Least Significant Difference post hoc.

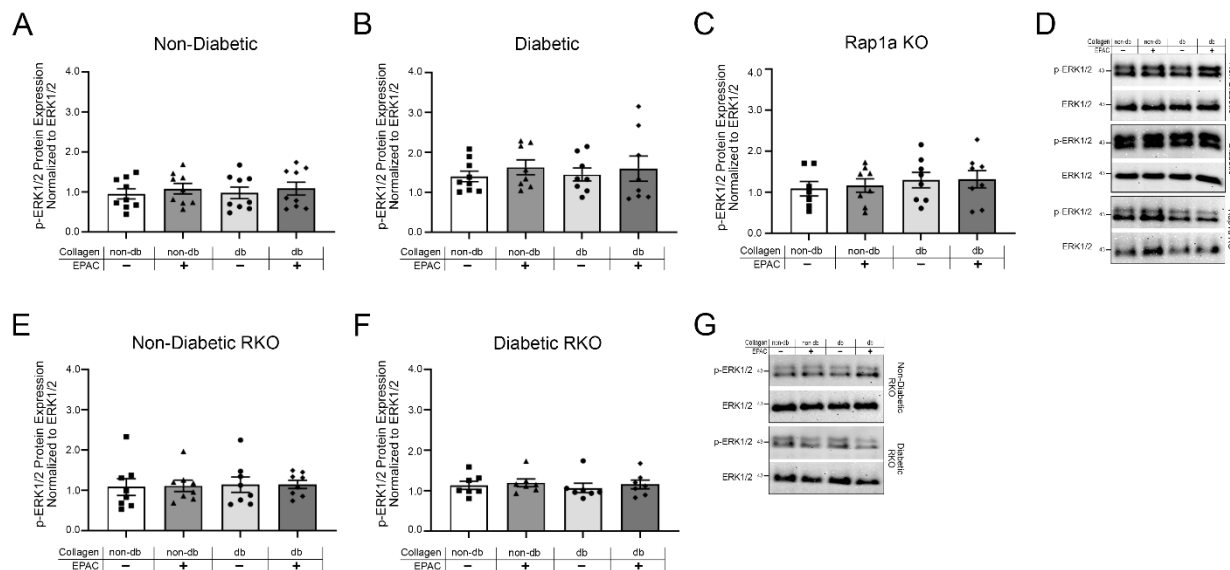

**Figure S2.** Exposure to endogenous AGEs with or without EPAC did not induce significant changes in p-ERK1/2 protein expression. Cardiac fibroblasts were isolated from (A) non-diabetic, (B) diabetic, (C) Rap1a KO, (E) non-diabetic RKO, and (F) diabetic RKO mouse hearts and were cultured on either non-diabetic or diabetic collagen. Cells were treated with EPAC and used to isolate protein to assess for changes in p-ERK1/2 (44 and 42 kDa, respectively) protein expression. Expression of p-ERK1/2 was normalized to total ERK1/2 and mean  $\pm$  SEM were displayed in graphs (n = 7–11). (D,G) Representative Western blot images for p-ERK1/2 and total ERK1/2 in cardiac fibroblasts. Statistical analysis consisted of a one-way ANOVA followed by a Fisher's Protected Least Significant Difference post hoc.

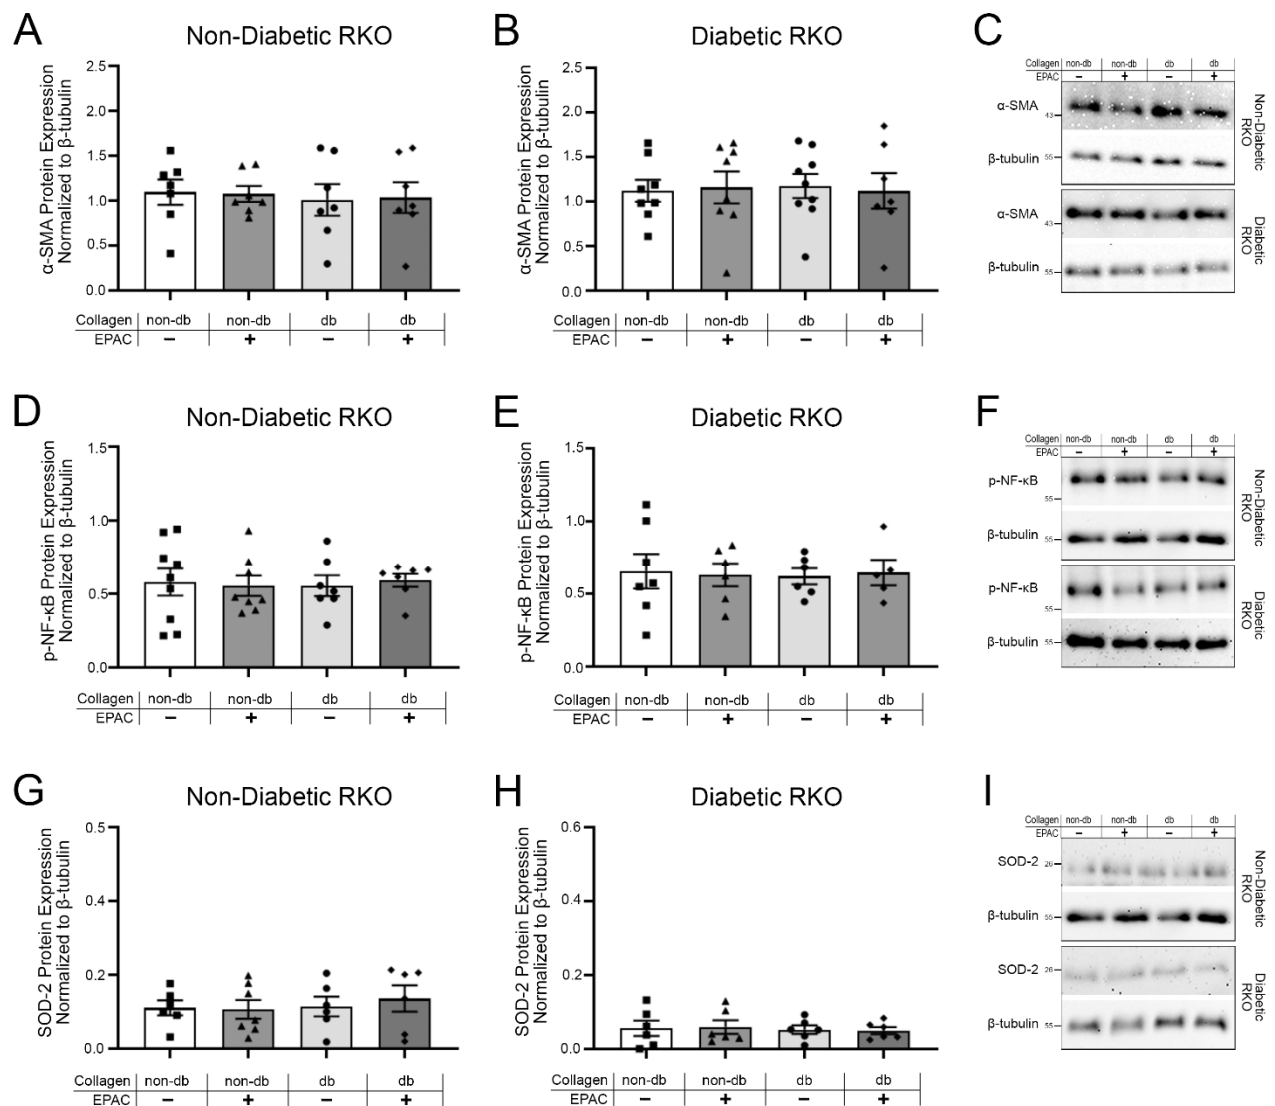

**Figure S3.** RKO cardiac fibroblasts did not display changes in expression of AGE/RAGE-associated proteins when exposed to endogenous AGEs or increased Rap1a activity. Non-diabetic RKO and diabetic RKO cardiac fibroblasts were isolated and P1 fibroblasts were cultured on either non-diabetic or diabetic collagen. Fibroblasts were either left untreated or treated with EPAC (100  $\mu$ M) and used to isolate total protein. Changes in protein expression for (A,B)  $\alpha$ -SMA (42 kDa), (D,E) p-NF- $\kappa$ B (65 kDa), and (G,H) SOD-2 (25 kDa) were determined for both (A,D,G) non-diabetic and (B,E,H) diabetic RKO fibroblasts. Protein expression was normalized to  $\beta$ -tubulin (55 kDa). Values within graphs are mean  $\pm$  SEM (n = 6–9) and one-way ANOVA followed by a Fisher's Protected Least Significant Difference post hoc was utilized to determine significance. (C,F,I) Representative Western blot images are depicted for  $\alpha$ -SMA, p-NF- $\kappa$ B, and SOD-2 expression.

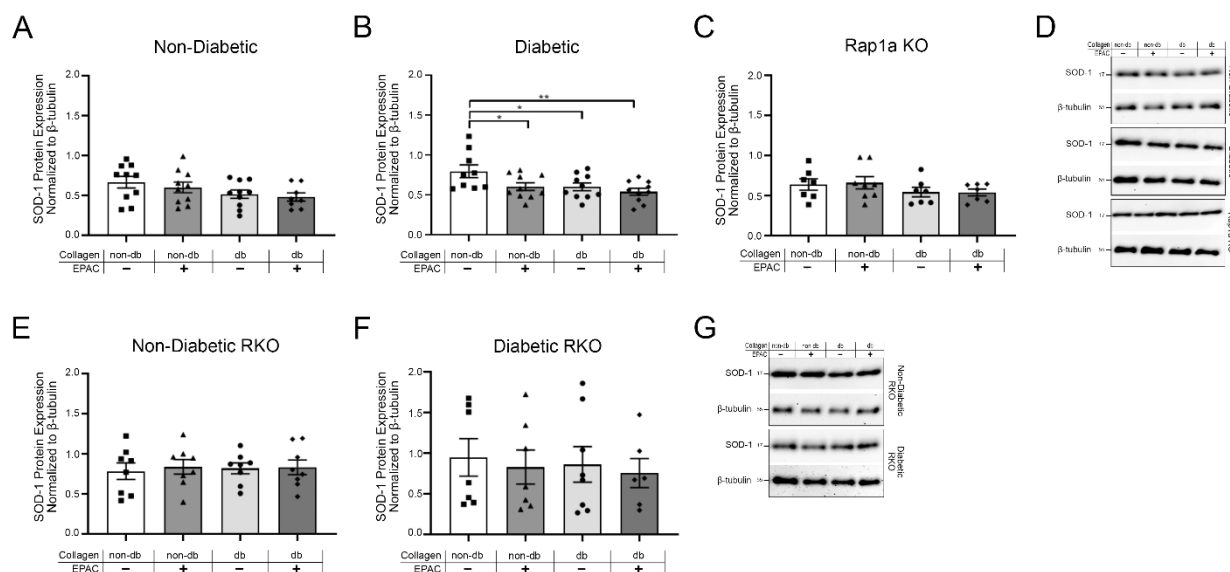

**Figure S4. Diabetic collagen caused a slightly decreased SOD-1 expression in RAGE wildtype cardiac fibroblasts.** Isolated cardiac fibroblasts from (A) non-diabetic, (B) diabetic, (C) Rap1a KO, (E) non-diabetic RKO, and (F) diabetic RKO were cultured on non-diabetic or diabetic collagen and treated with EPAC (100  $\mu$ M). Total protein was collected, and expression of oxidative marker SOD-1 (23 kDa) was determined. SOD-1 protein expression was normalized to  $\beta$ -tubulin (55 kDa) and mean  $\pm$  SEM are presented within the graphs ( $n = 5-10$ ). One-way ANOVA followed by a Fisher's Least Significant Difference post hoc was used to determine significant differences ( $p < 0.05$  and  $* p < 0.01$ ). (D and G) Representative Western blot images are presented for SOD-1 expression.

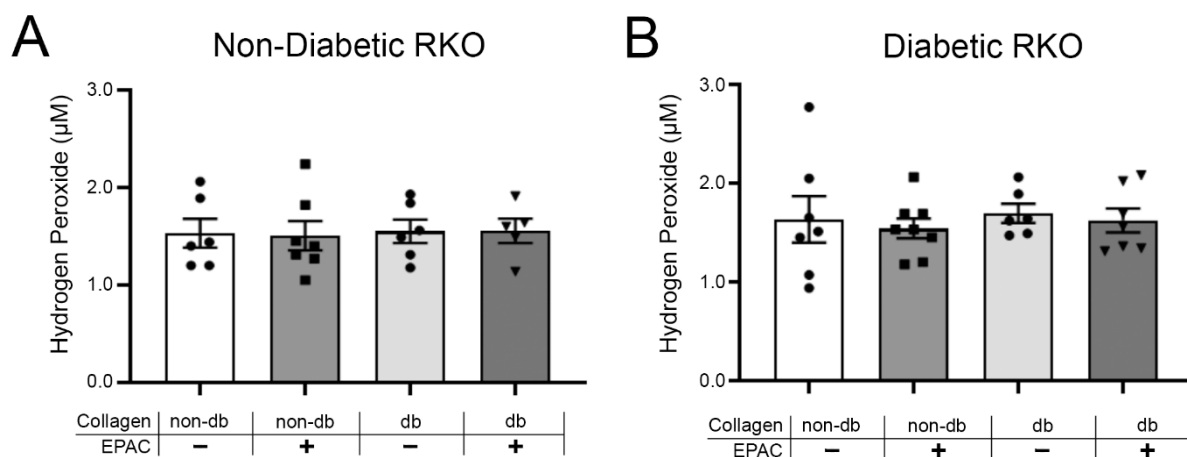

**Figure S5. Exposure to endogenous AGEs and EPAC did not induce changes in hydrogen peroxide concentration in non-diabetic and diabetic RKO cardiac fibroblasts.** (A) Non-diabetic RKO and (B) diabetic cardiac fibroblasts (P1) were cultured on either non-diabetic or diabetic collagen and treated with EPAC (100  $\mu$ M). Protein lysates were assessed for hydrogen peroxide concentration ( $\mu$ M) and mean  $\pm$  SEM were depicted on graphs ( $n = 5-8$ ). Statistical analysis consisted of a one-way ANOVA followed by a Fisher's Protected Least Significant Difference post hoc.
